# Supplementary material for: Repetitive transcranial magnetic stimulation versus Fluvoxamine in the treatment of obsessive-compulsive disorder: A randomized open-label pilot study
Source: Research Square preprint supplement (doi:10.21203/rs.3.rs-6655404/v1), 2025-07-22
Supplement: Supplementary file 1 [file bebd4575376f5c22d57078ab.xlsx]

## Sheet: Sheet1
变量分组	gender	age(y）	education(y)	duration（mon）	onset year（y）	Y-BOCS1	Y-BOCS2	BDI1	BDI2	BAI1	BAI2
A	2	20	15	42	15.5	13	9	21	13	67	58
A	1	58	9	120	49	11	8	1	0	26	24
A	2	16	10	24	14	15	6	4	2	54	32
A	2	24	15	48	20	26	26	6	11	34	15
A	1	25	9	36	22	25	24	23	20	52	47
A	1	63	9	180	47	12	7	9	0	40	29
A	2	22	16	36	20	16	16	7	6	55	53
A	1	21	12	3	21	23	25	15	17	38	48
A	1	30	9	1	30	13	4	5	3	64	34
A	2	45	9	50	24	16	5	5	1	34	35
B	1	33	12	192	17	20	20	18	18	48	45
B	1	17	11	96	10	19	15	2	1	51	71
B	1	36	16	6	35.5	8	7	12	12	29	34
B	1	56	15	300	29	19	8	5	3	47	33
B	2	29	15	60	25	29	23	18	11	61	24
B	2	32	9	3	31.5	20	17	5	8	34	44
B	1	20	13	96	12	21	19	7	2	28	28
B	2	28	16	2	28	14	3	7	1	34	34
B	1	27	15	36	24	22	11	18	6	58	53
B	2	31	12	36	28	22	20	4	2	45	41
B	1	18	15	25	16	23	12	6	6	32	29
B	1	22	16	12	21	23	16	6	1	32	29
